# Supplementary material for: Ferroelectricity-enhanced potassium-ion storage in van der Waals layered CuInP2S6
Source: Royal Society of Chemistry journal article supplement (doi:10.1039/d4ta05014b), 2024-01-01
Supplement: d4ta05014b1.pdf [file d4ta05014b1.pdf]

## Supporting information

### **Ferroelectricity-enhanced potassium-ion storage in van der Waals layered $\text{CuInP}_2\text{S}_6$**

*Po-Wen Chien,<sup>†</sup> Yu-Bo Hung,<sup>†</sup> Yi-Chun Yang and Hsing-Yu Tuan\**

*P.-W. Chien, Y.-B. Hung, Y.-C. Yang, H.-Y. Tuan\**

Department of Chemical Engineering, National Tsing Hua University, Hsinchu 30013,  
Taiwan

Email: [hytuan@che.nthu.edu.tw](mailto:hytuan@che.nthu.edu.tw)

<sup>†</sup>: These authors contributed equally to this work and share first authorship.

**Table S1.** Crystallographic parameters of CuInP<sub>2</sub>S<sub>6</sub> refined by the Rietveld method.

| Site                  | Atom | x                    | y       | z         | Occ   |
|-----------------------|------|----------------------|---------|-----------|-------|
| Cu_1                  | Cu   | 0.0957               | 0.3355  | 0.3869    | 0.875 |
| Cu_2                  | Cu   | -0.069               | 0.335   | 0.149     | 0.1   |
| In_1                  | In   | 0                    | 0.00192 | 0.25      | 1     |
| P_1                   | P    | 0.5686               | 0.169   | 0.3491    | 1     |
| P_2                   | P    | 0.4505               | 0.1674  | 0.1788    | 1     |
| S_1                   | S    | 0.2808               | 0.1512  | 0.395     | 1     |
| S_2                   | S    | 0.2332               | 0.1645  | 0.893     | 1     |
| S_3                   | S    | 0.7845               | 0.0177  | 0.395     | 1     |
| S_4                   | S    | 0.74                 | 0.1727  | 0.1336    | 1     |
| S_5                   | S    | 0.7555               | 0.1747  | 0.6404    | 1     |
| S_6                   | S    | 0.2722               | -0.0057 | 0.6379    | 1     |
| a=6.1057              |      | b=10.5569            |         | c=13.5973 |       |
| R <sub>wp</sub> =5.19 |      | R <sub>p</sub> =4.29 |         |           |       |

**Table S2.** ICP concentrations of the as-synthesized CuInP<sub>2</sub>S<sub>6</sub> (CIPS)

| Sample                            | Cu<br>(at%) | In<br>(at%) | P<br>(at%) | S<br>(at%) |
|-----------------------------------|-------------|-------------|------------|------------|
| CuInP <sub>2</sub> S <sub>6</sub> | 11.69       | 11.43       | 20.94      | 55.94      |

**Table S3.** Comparison of diffusion coefficients between CIPS@G and FePS<sub>3</sub>@G at different stages.

| Stage / D <sub>K</sub> <sup>+</sup> | Stage I                | Stage II               | Stage III              |
|-------------------------------------|------------------------|------------------------|------------------------|
| CIPS@G                              | $1.19 \times 10^{-10}$ | $3.33 \times 10^{-11}$ | $1.12 \times 10^{-11}$ |
| FePS <sub>3</sub> @G                | $1.61 \times 10^{-11}$ | $1.98 \times 10^{-11}$ | $1.98 \times 10^{-11}$ |

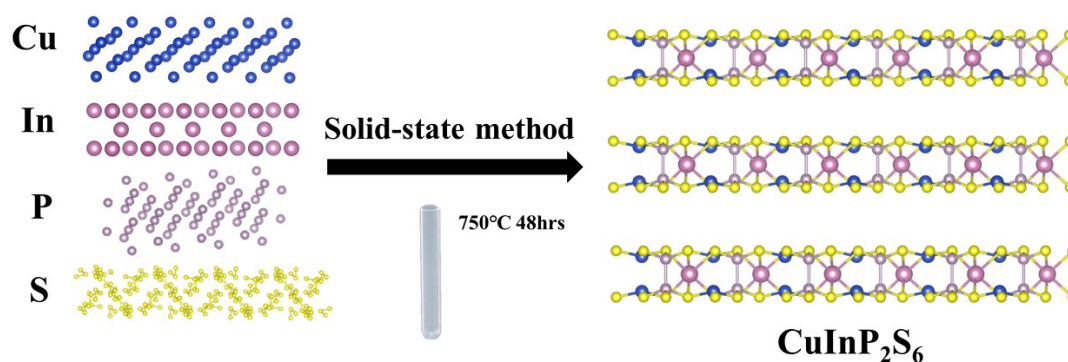

**Figure S1.** Schematic of the synthesis process of CIPS.

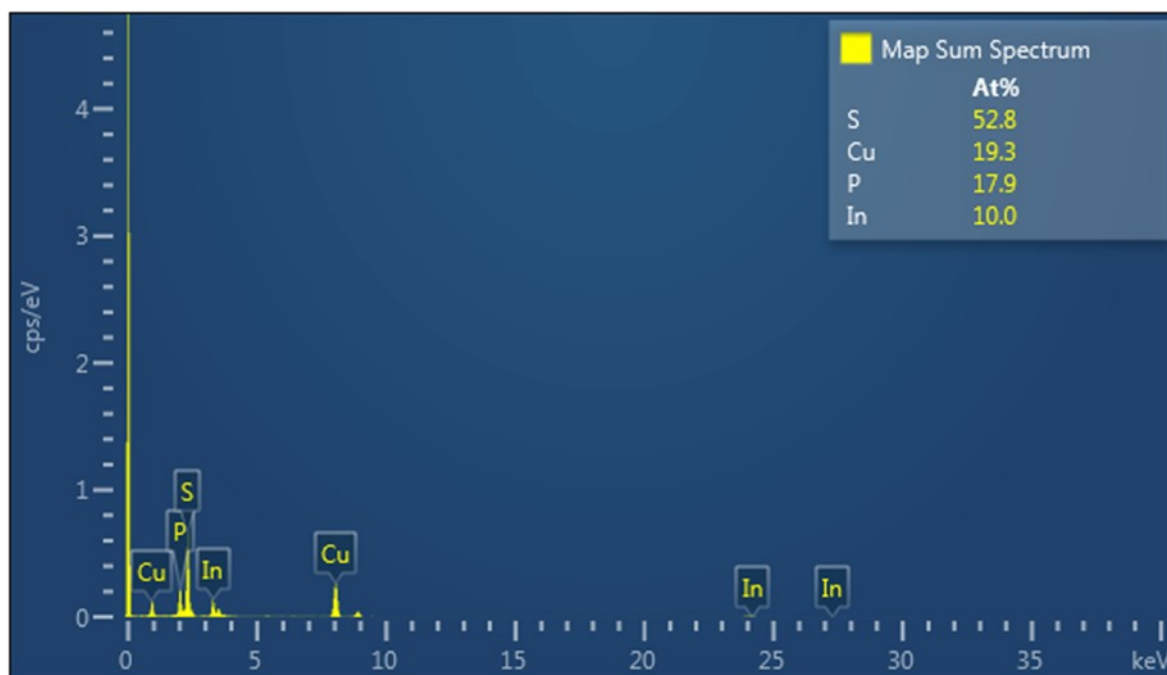

**Figure S2.** EDS mapping result of CIPS.

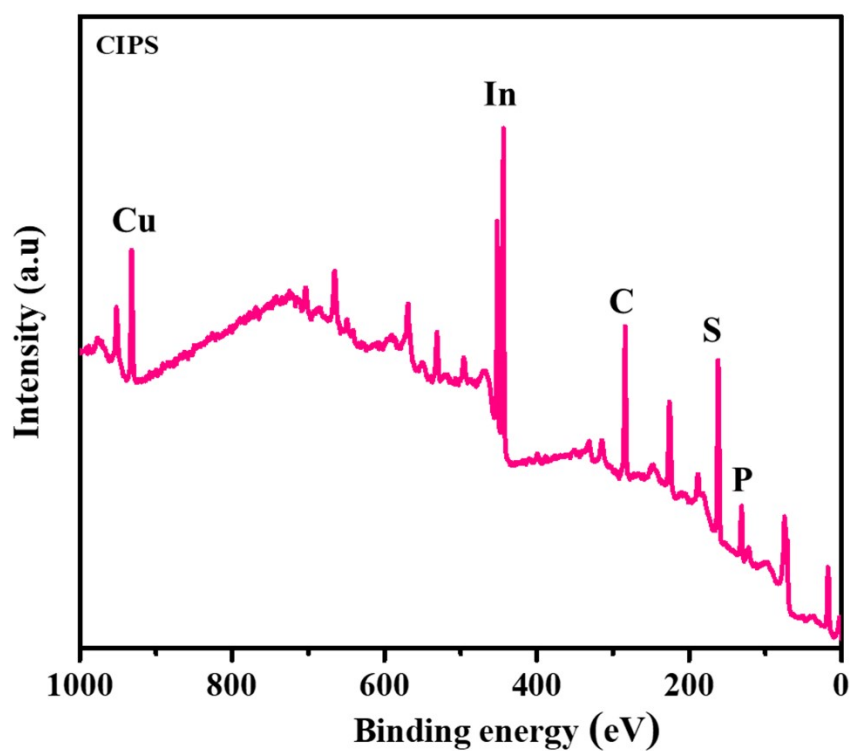

**Figure S3.** The full survey XPS spectrum of CIPS.

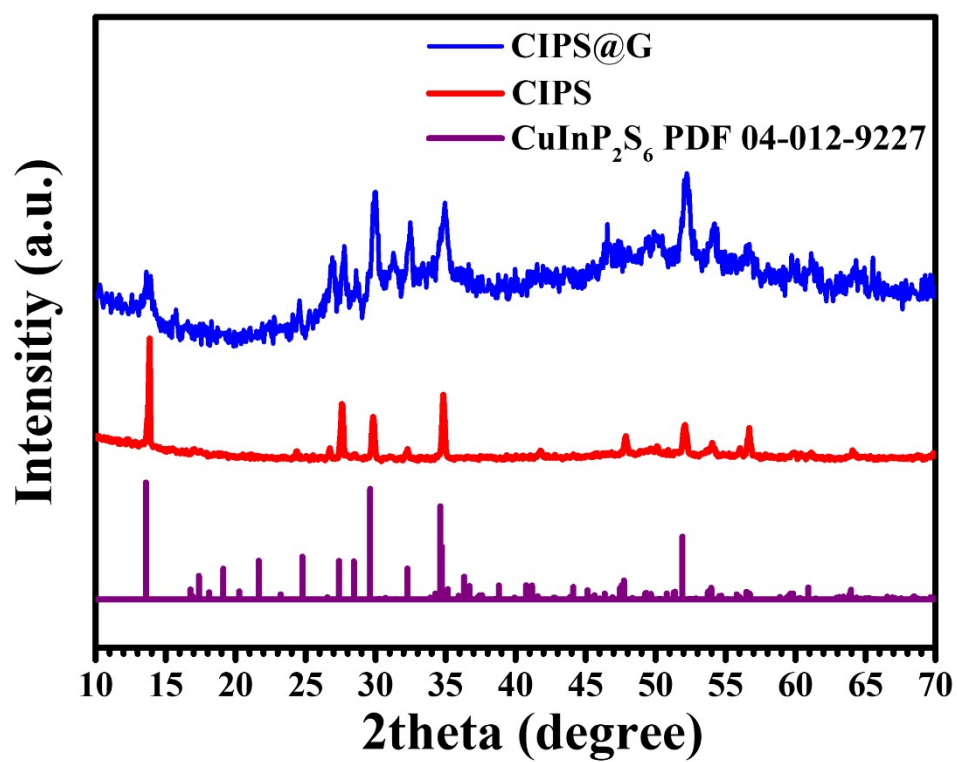

**Figure S4.** XRD pattern of CIPS@G.

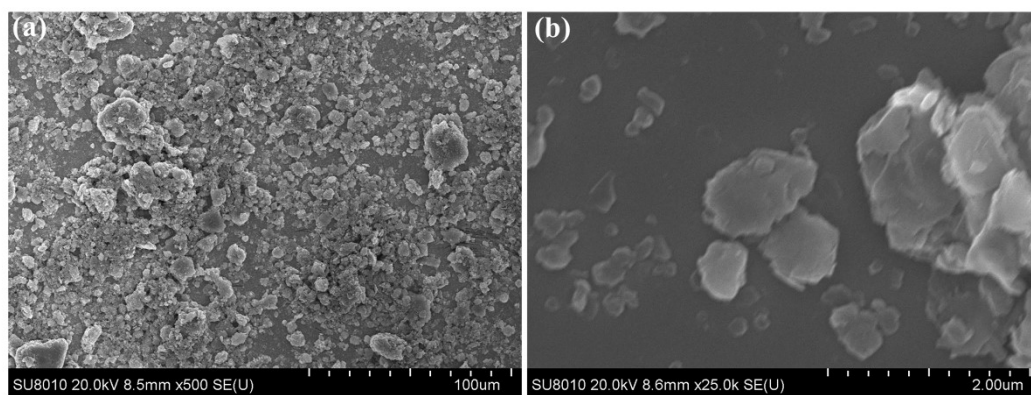

**Figure S5.** SEM image of CIPS@G.

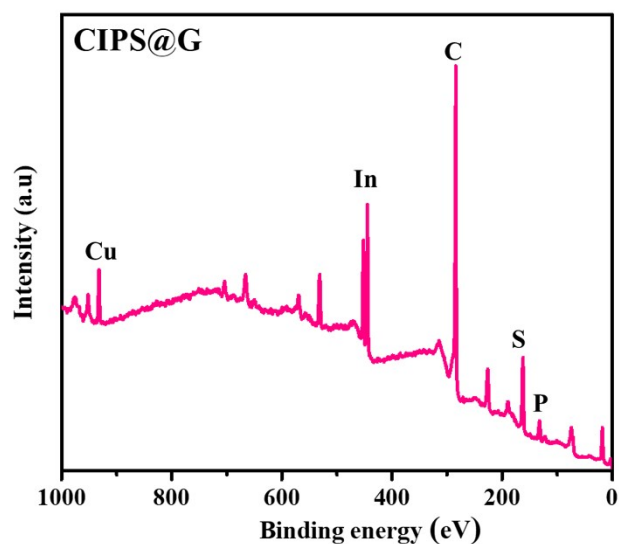

**Figure S6.** The full survey XPS spectrum of CIPS@G.

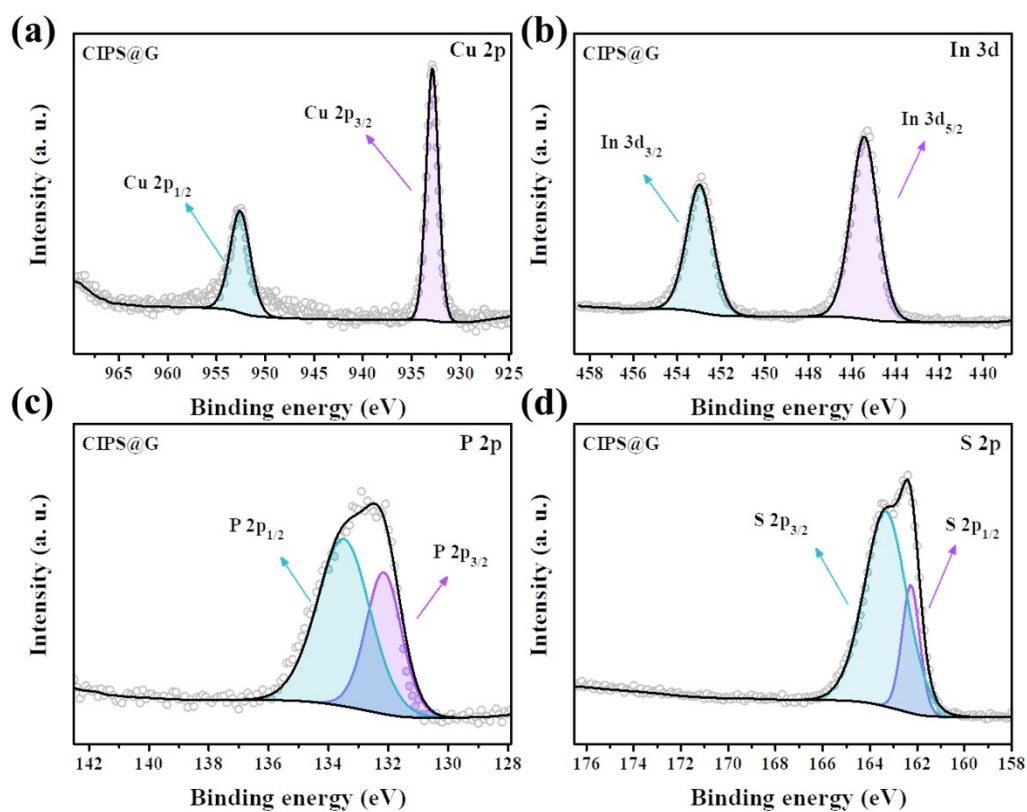

**Figure S7.** High-resolution (a) Cu 2p, (b) In 3d, (c) P 2p, and (d) S 2p XPS spectra of CIPS@G nanoflakes.

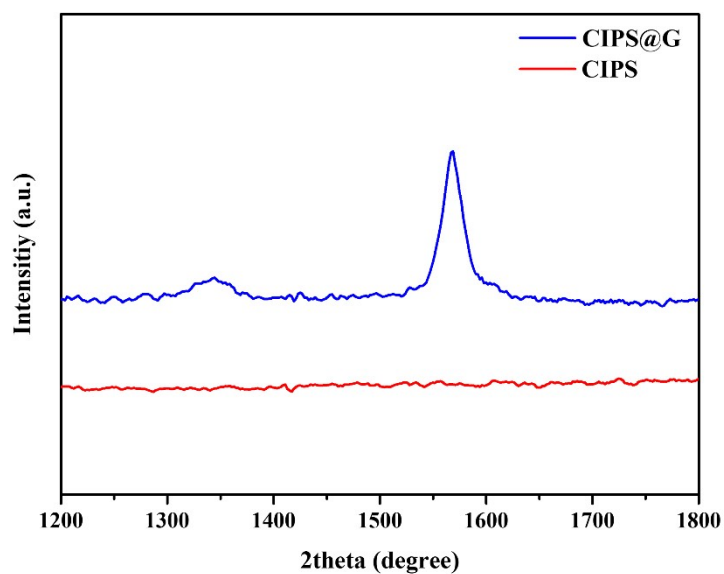

Figure S8. Raman spectra of CIPS and CIPS@G.

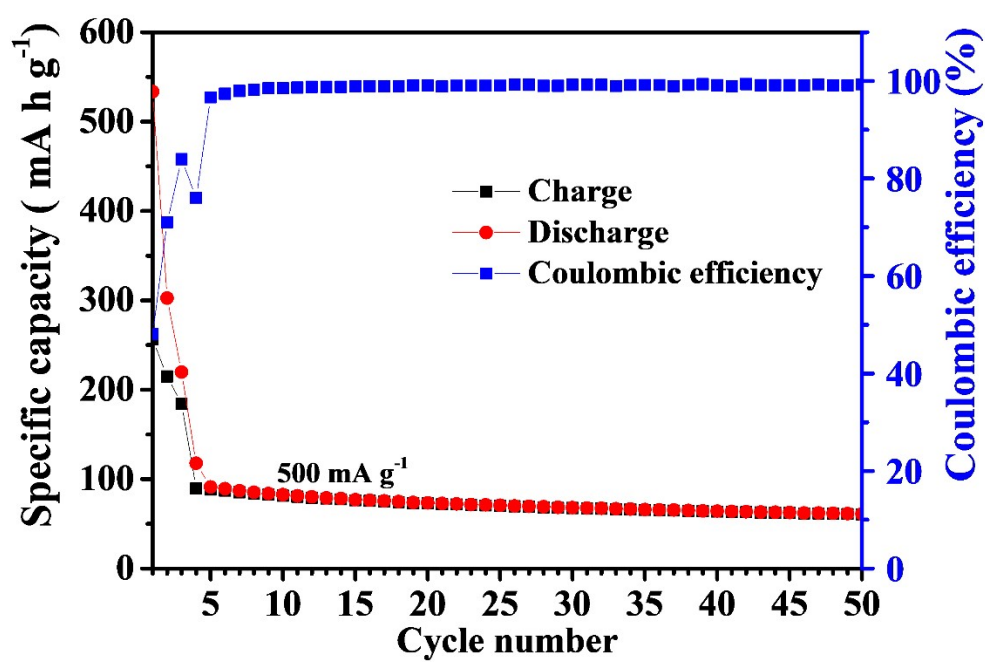

Figure S9. Electrochemical performance of pure CIPS.

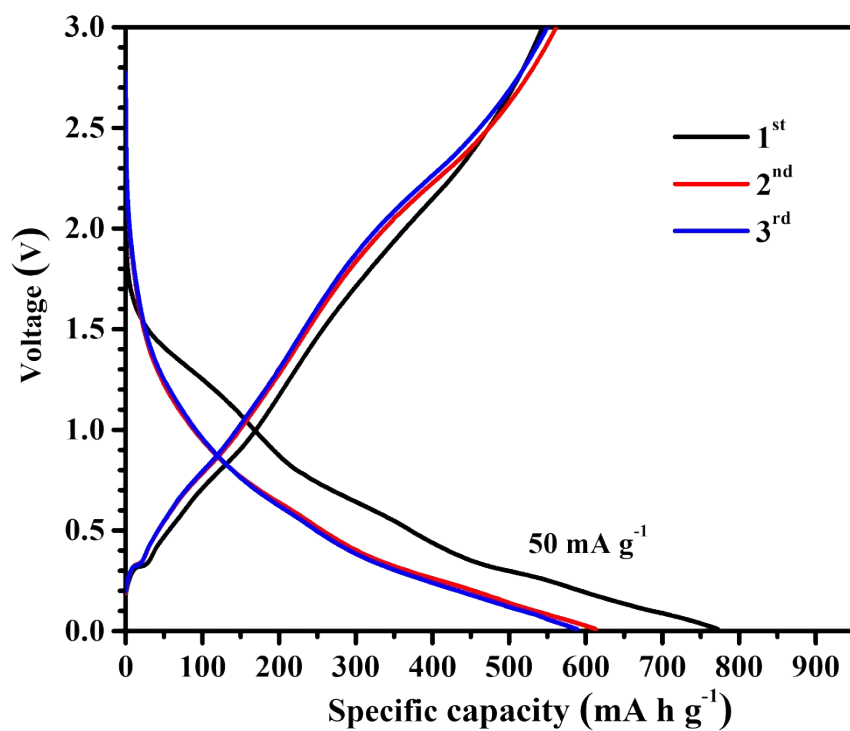

**Figure S10.** GCD curve of CIPS@G at a current density of 50 mA g<sup>-1</sup>.

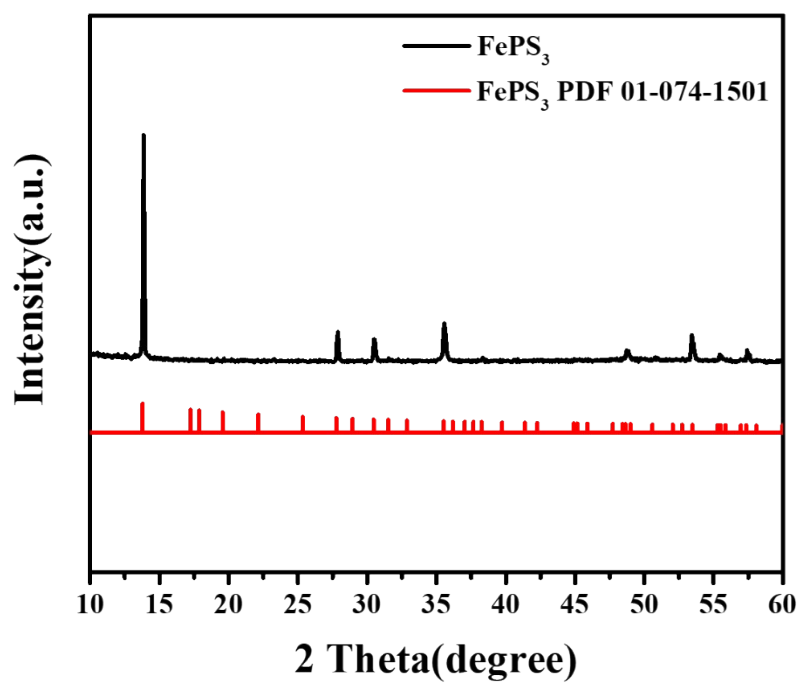

**Figure S11.** XRD pattern of FePS<sub>3</sub>.

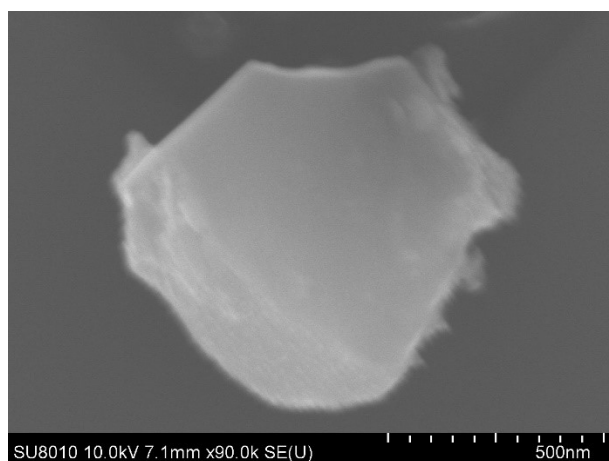

**Figure S12.** SEM image of FePS<sub>3</sub>@G.

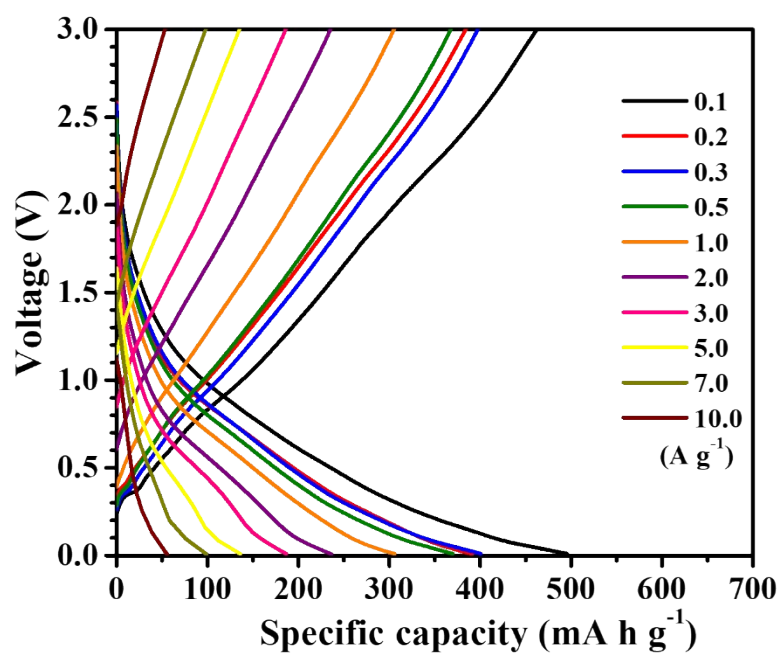

**Figure S13.** Galvanostatic charge/discharge curves of CIPS@G at various current densities.



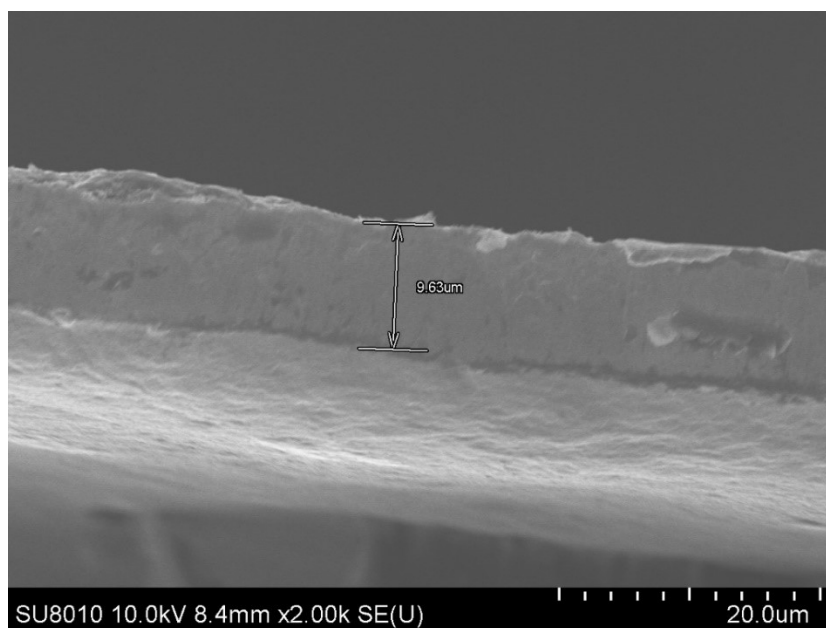

**Figure S14.** Cross-sectional SEM images and the thickness of CIPS@G electrodes.

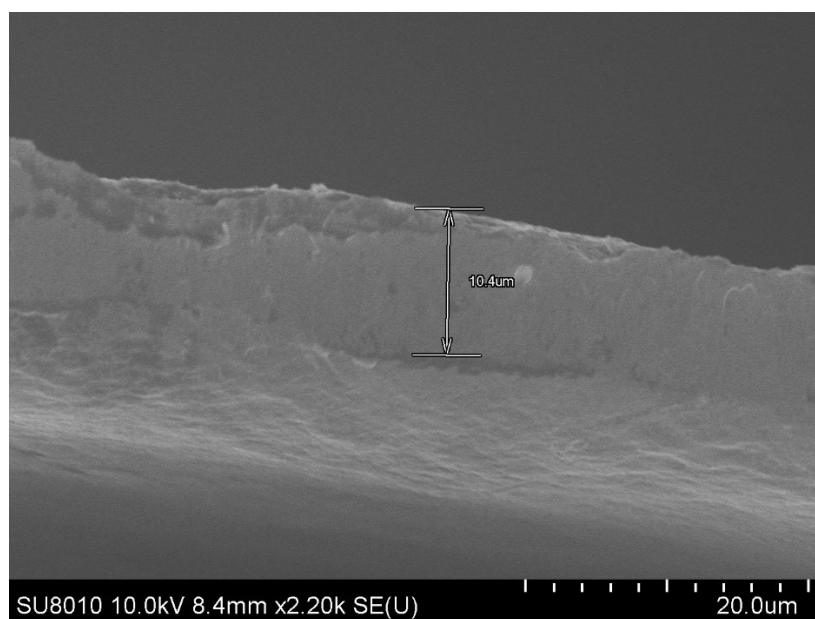

**Figure S15.** Cross-sectional SEM images and the thickness of FePS<sub>3</sub>@G electrodes.

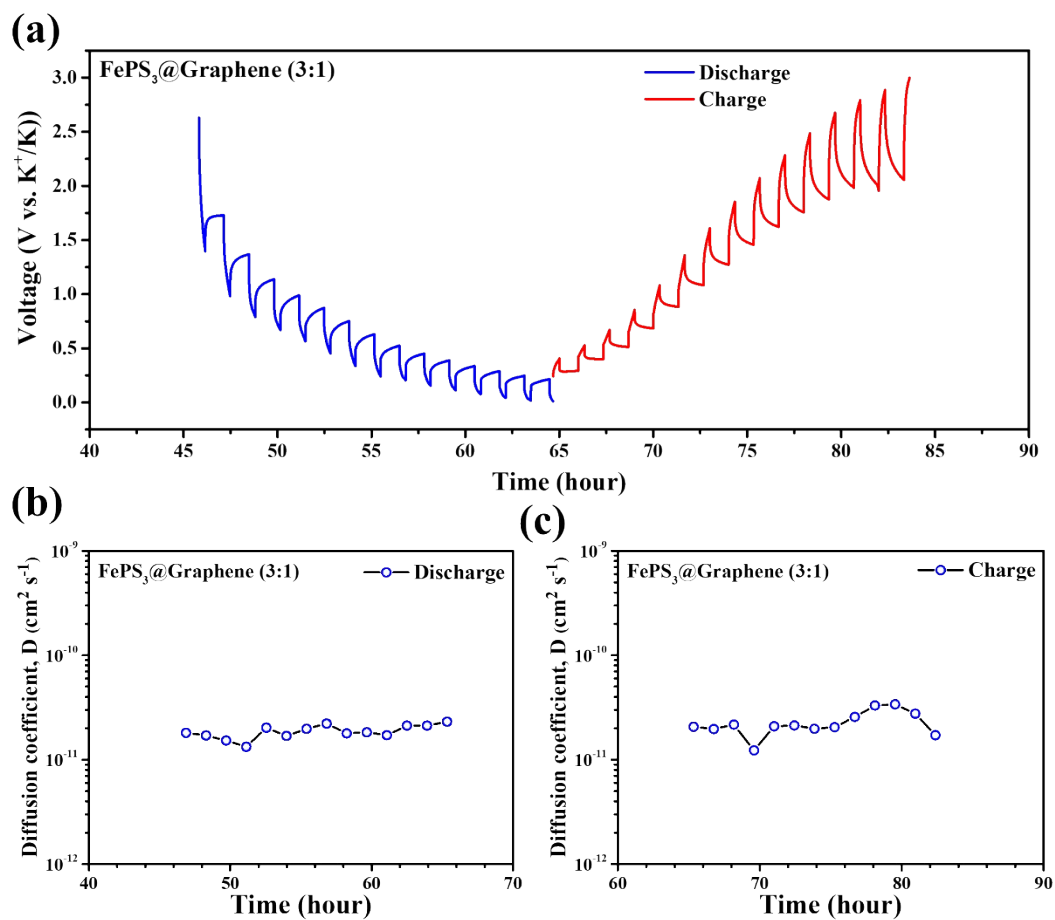

**Figure S16.** (a) GITT curves of FePS<sub>3</sub>@G with 20 min current pulse of 50 mA g<sup>-1</sup> followed by 1 hour relaxation and corresponding diffusion coefficients of (b) discharge and (c) charge process.

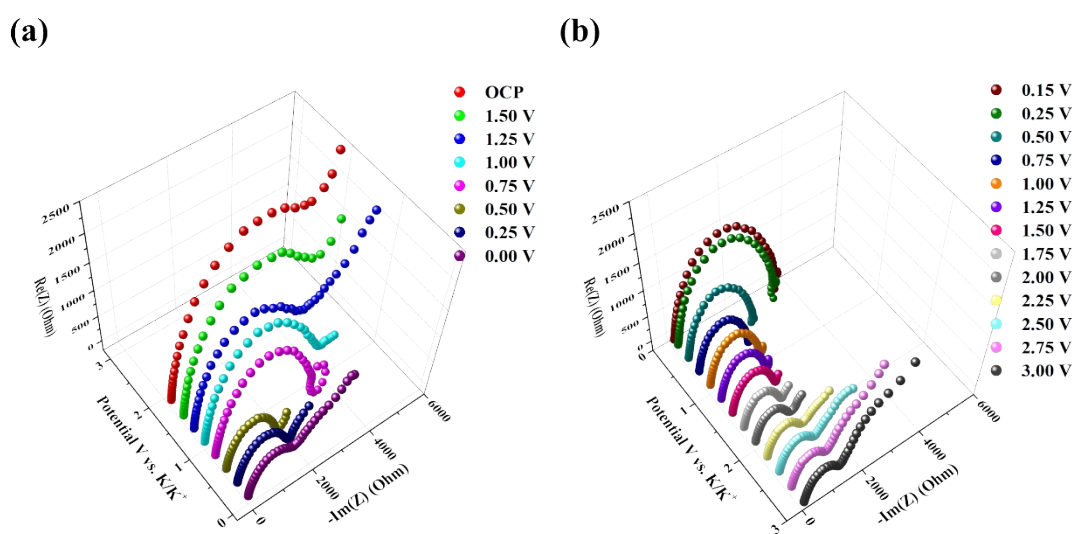

**Figure S17.** In-situ EIS test performed in selected potentials. (a) Discharging process. (b) Charging process.

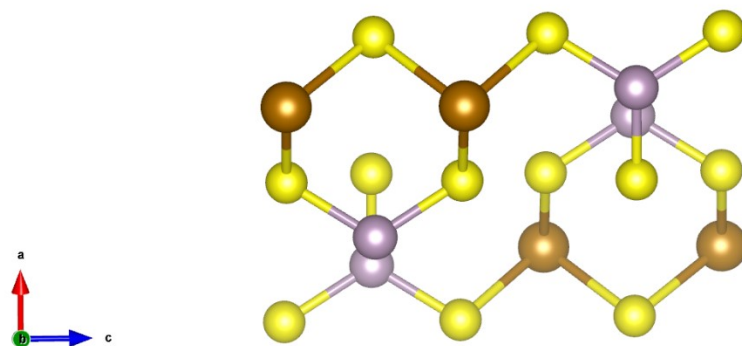

**Figure S18.** Crystal structure of FePS<sub>3</sub>.

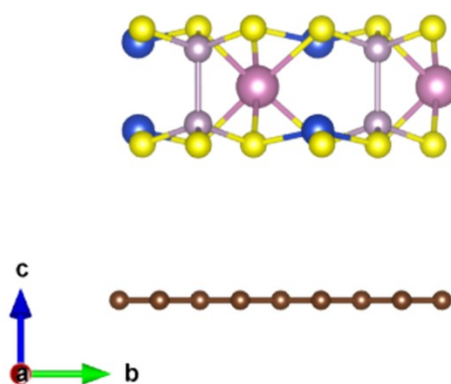

**Figure S19.** Crystal structure of CIPS@G.

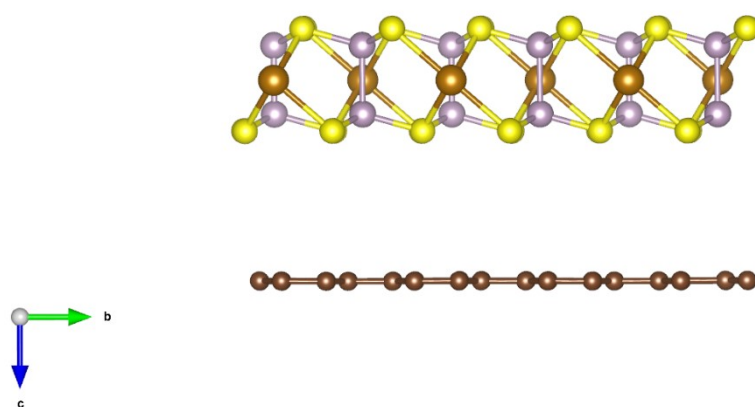

**Figure S20.** Crystal structure of FePS<sub>3</sub>@G.

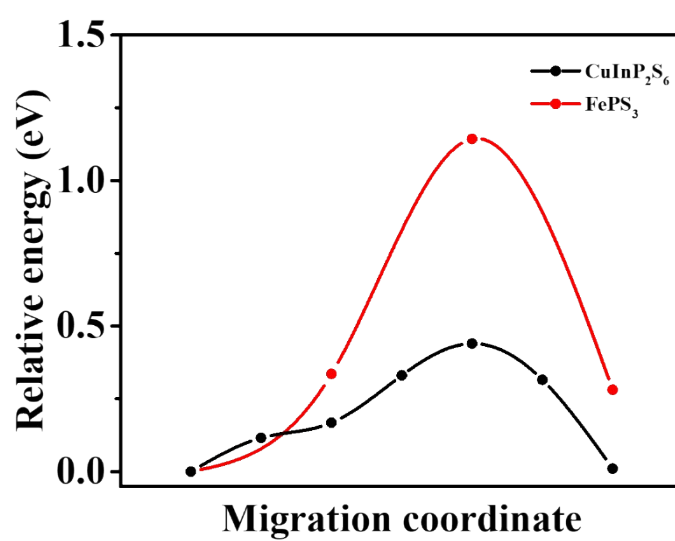

**Figure S21.** Calculated energy barriers of K between CIPS layers and graphene, and between FePS<sub>3</sub> and graphene.

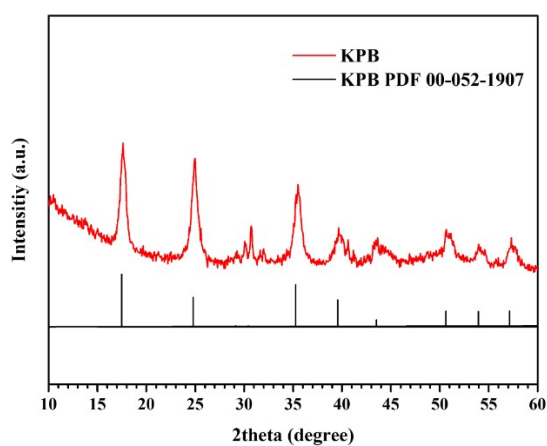

**Figure S22.** XRD pattern of PB.

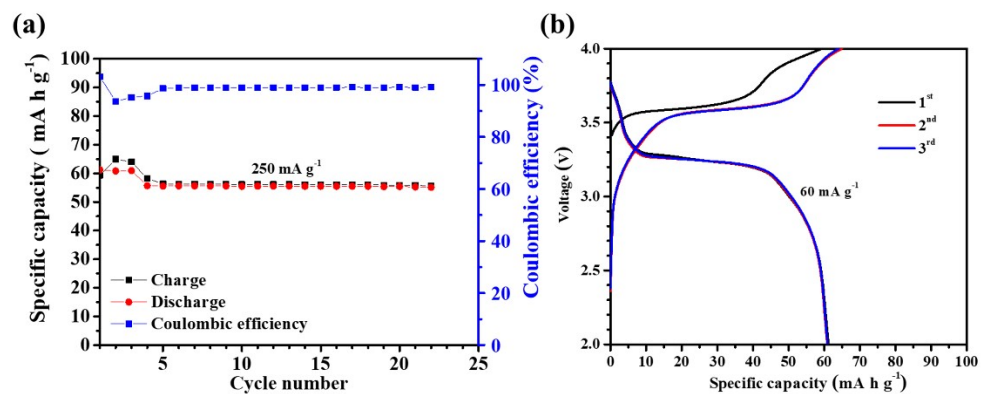

**Figure S23.** (a) Cycling performances of PB at 250 mA g<sup>-1</sup> and (b) corresponding galvanostatic charge-discharge curves.

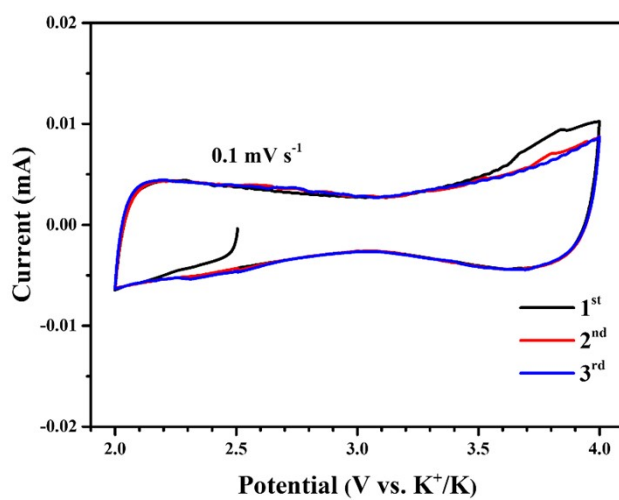

**Figure S24.** Cyclic voltammetry curves of AC electrodes at 0.1 mV s<sup>-1</sup>.
